# Supplementary material for: Specific anti-glycan antibodies are sustained during and after parasite clearance in Schistosoma japonicum-infected rhesus macaques
Source: PLOS journal article supplement (doi:10.1371/journal.pntd.0005339), 2017-02-02
Supplement: S1 (10.1371/journal.pntd.0005339.s001) [file journal.pntd.0005339.s001]

## S1 Table

## A Distribution of glycan origin in each IgG glycan cluster

|        | IgG-C1 |     | IgG-C2 |     | IgG-C3 |     | IgG-C4 |     |
|--------|--------|-----|--------|-----|--------|-----|--------|-----|
| worm N | 4%     |     | 0%     |     | 33%    |     | 51%    |     |
| cerc N | 3%     | 17% | 8%     | 15% | 26%    | 75% | 23%    | 88% |
| egg N  | 10%    |     | 7%     |     | 16%    |     | 15%    |     |
| worm O | 5%     |     | 8%     |     | 13%    |     | 11%    |     |
| cerc O | 37%    | 66% | 33%    | 84% | 4%     | 25% | 0%     | 12% |
| egg O  | 24%    |     | 43%    |     | 7%     |     | 1%     |     |
| GSL    |        | 17% |        | 1%  |        | 0%  |        | 0%  |

## B Putative glycan motifs present in each IgG glycan cluster

| Putative epitopes      |                                                                                     | IgG-C1        | IgG-C2        | IgG-C3       | IgG-C4       |
|------------------------|-------------------------------------------------------------------------------------|---------------|---------------|--------------|--------------|
| Size of cluster        |                                                                                     | 177 fractions | 123 fractions | 69 fractions | 75 fractions |
| Core $\alpha$ 6-fucose | 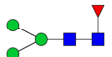   | 6%            | 7%            | 32%          | 41%          |
| Xylose                 |    | 4%            | 7%            | 9%           | 11%          |
| LN                     |   | 15%           | 24%           | 29%          | 27%          |
| LeX                    |  | 33%           | 34%           | 23%          | 13%          |
| Di-LeX                 |  | 10%           | 7%            | 7%           | 1%           |
| Tri-LeX                |  | 2%            | 0%            | 0%           | 0%           |
| LDN                    |  | 10%           | 12%           | 16%          | 17%          |
| LDN(F=1)               |  | 12%           | 14%           | 3%           | 0%           |
| LDN(F $\geq$ 2)        |  | 25%           | 10%           | 1%           | 0%           |
| $\alpha$ 2-Mannose     |  | 9%            | 7%            | 30%          | 36%          |
| Gn                     |  | 19%           | 31%           | 26%          | 20%          |
| Gn(F $\geq$ 1)         |  | 20%           | 30%           | 13%          | 4%           |
| $\beta$ 1-6 gal        |  | 8%            | 12%           | 1%           | 0%           |
| Gal-LDN                |  | 6%            | 12%           | 0%           | 0%           |
| Gal-LDN (F $\geq$ 1)   |  | 6%            | 13%           | 0%           | 0%           |

The most likely glycan motifs were depicted for each glycan fraction present in individual clusters. The percentages of each glycan motif present in each glycan cluster is shown. For most of the glycan fraction, more than one possible motif is present.
