# Supplementary material for: Specific anti-glycan antibodies are sustained during and after parasite clearance in Schistosoma japonicum-infected rhesus macaques
Source: PLOS journal article supplement (doi:10.1371/journal.pntd.0005339), 2017-02-02
Supplement: S4 (10.1371/journal.pntd.0005339.s004) [file journal.pntd.0005339.s004]

S4 Table

**A Glycan origins present in the IgG<sup>high</sup>IgM<sup>low</sup> and IgG<sup>low</sup>IgM<sup>high</sup> group**

|                 | IgG <sup>high</sup> IgM <sup>low</sup> |     | IgG <sup>low</sup> IgM <sup>high</sup> |     |
|-----------------|----------------------------------------|-----|----------------------------------------|-----|
| Size of cluster | 25 fractions                           |     | 12 fractions                           |     |
| worm N          | 12%                                    |     | 8%                                     |     |
| cerc N          | 0%                                     | 24% | 17%                                    | 42% |
| egg N           | 12%                                    |     | 17%                                    |     |
| worm O          | 12%                                    |     | 0%                                     |     |
| cerc O          | 56%                                    | 76% | 0%                                     | 42% |
| egg O           | 8%                                     |     | 42%                                    |     |
| lipid           |                                        | 0%  |                                        | 17% |

Fractions that had a significant IgG and IgM response difference were grouped into the IgG<sup>high</sup>IgM<sup>low</sup> (IgG response>IgM response) or the IgG<sup>low</sup>IgM<sup>high</sup> (IgM response>IgG response) group. The IgG<sup>high</sup>IgM<sup>low</sup> group was characterized by O- glycans, in particular cercariae derived O- glycans.

**B Putative glycan motifs present in the IgG<sup>high</sup>IgM<sup>low</sup> and IgG<sup>low</sup>IgM<sup>high</sup> group**

| Putative epitopes |  | IgG <sup>high</sup> IgM <sup>low</sup> | IgG <sup>low</sup> IgM <sup>high</sup> |
|-------------------|--|----------------------------------------|----------------------------------------|
| Size of cluster   |  | 25 fractions                           | 12 fractions                           |
| Core α6-fucose    |  | 12%                                    | 42%                                    |
| Xylose            |  | 4%                                     | 17%                                    |
| LN                |  | 20%                                    | 17%                                    |
| LeX               |  | 16%                                    | 33%                                    |
| Di-LeX            |  | 12%                                    | 17%                                    |
| Tri-LeX           |  | 0%                                     | 8%                                     |
| LDN               |  | 36%                                    | 25%                                    |
| LDN(F=1)          |  | 32%                                    | 33%                                    |
| LDN(F≥2)          |  | 44%                                    | 0%                                     |
| α2-Mannose        |  | 8%                                     | 0%                                     |
| Gn                |  | 32%                                    | 42%                                    |
| Gn(F≥1)           |  | 12%                                    | 50%                                    |
| β1-6 gal          |  | 12%                                    | 0%                                     |
| Gal-LDN           |  | 12%                                    | 25%                                    |
| Gal-LDN(F≥1)      |  | 12%                                    | 25%                                    |

Glycan Motifs present in the IgG<sup>high</sup>IgM<sup>low</sup> and IgG<sup>low</sup>IgM<sup>high</sup> group.
