# Supplementary material for: Specific anti-glycan antibodies are sustained during and after parasite clearance in Schistosoma japonicum-infected rhesus macaques
Source: PLOS journal article supplement (doi:10.1371/journal.pntd.0005339), 2017-02-02
Supplement: S5 (10.1371/journal.pntd.0005339.s005) [file journal.pntd.0005339.s005]

S1 Fig

IgG response profile of different glycan motifs

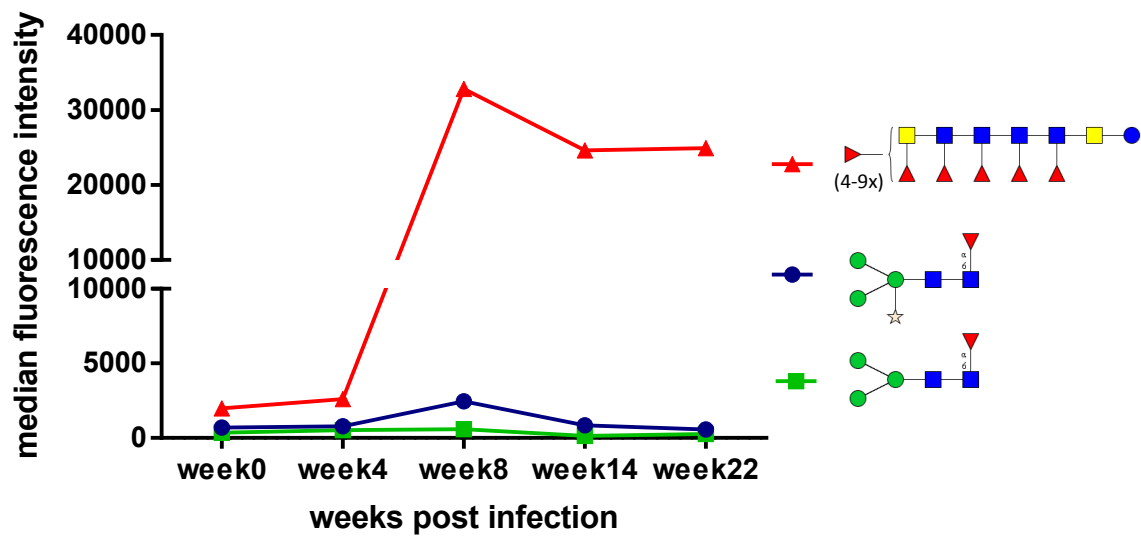

Average median fluorescence intensities are shown for *S. japonicum*-infected macaque serum IgG over a time course of 22 weeks towards different glycan motifs.
