# Supplementary material for: Specific anti-glycan antibodies are sustained during and after parasite clearance in Schistosoma japonicum-infected rhesus macaques
Source: PLOS journal article supplement (doi:10.1371/journal.pntd.0005339), 2017-02-02
Supplement: S6 (10.1371/journal.pntd.0005339.s006) [file journal.pntd.0005339.s006]

***In vitro* schistosomula incubation with heat inactivated *S. japonicum*-infected macaque sera**

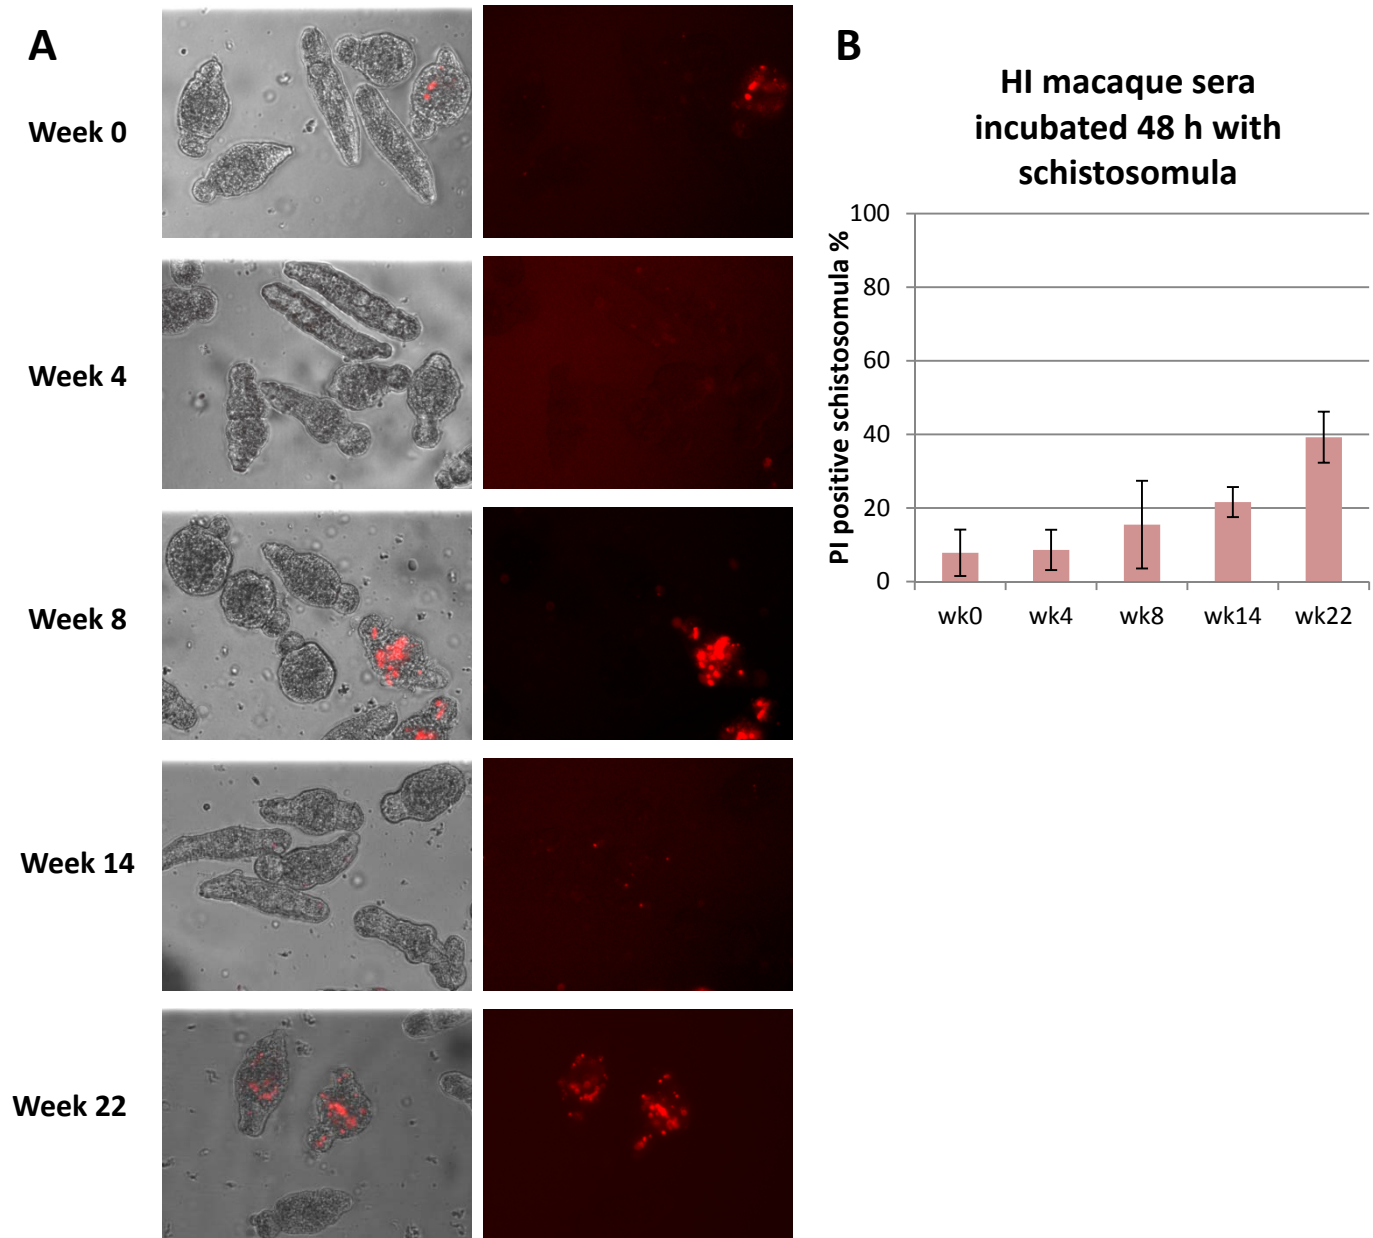

*In vitro* schistosomula incubation with heat inactivated (HI) *S. japonicum*-infected rhesus macaque sera collected at different infection time points.

HI Macaque sera were incubated with 3 h transformed schistosomula. Loss of Schistosomula integrity was visualized by PI positivity. A) Gross morphology of schistosomula after 48 h of incubation with HI macaque sera. B) Percentage of PI-positive schistosomula after 48 h of incubation with HI macaque sera at different infection time points.
