# Supplementary material for: Specific anti-glycan antibodies are sustained during and after parasite clearance in Schistosoma japonicum-infected rhesus macaques
Source: PLOS journal article supplement (doi:10.1371/journal.pntd.0005339), 2017-02-02
Supplement: S7 (10.1371/journal.pntd.0005339.s007) [file journal.pntd.0005339.s007]

**Binding of *S. japonicum*-infected macaque serum antibodies to schistosomula**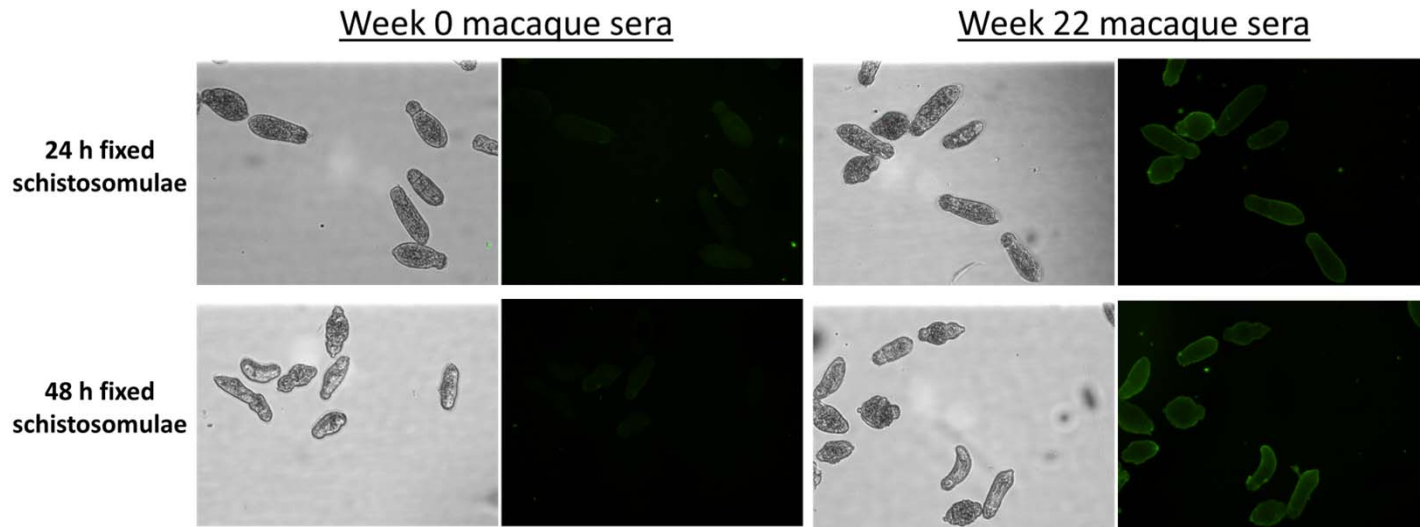

Schistosomula were fixed 24 h and 48 h after transformation in 2% PFA. Fixed schistosomula were washed twice in 200  $\mu$ l PBS and then incubated with 0.5  $\mu$ l of macaque serum (before infection and after 22 weeks of infection) in a suspension of 30  $\mu$ l for 30 minutes. Parasites were washed 1 time with PBS and then suspended in 25  $\mu$ l of 50x diluted rabbit-anti-human IgG, IgM IgA antibodies (DAKOPATTS) for 30 minutes. Afterwards, parasites were washed 3 times with PBS and suspended in 25  $\mu$ l of 200x diluted Alexa fluor 488-conjugated goat-anti-rabbit IgG (H+L) antibody (invitrogen) for 30 minutes. Finally, the parasites were washed once in PBS and analyzed by fluorescence microscopy.
